# Supplementary material
Source: PubMed Central journal article supplement (PMC8058235)
Supplement: NIHMS1658542-supplement-1.pdf [file NIHMS1658542-supplement-1.pdf]

## Supplementary Material

**Supplementary Table.** Incidence of cognitive impairment according to a more extreme threshold of  $\geq 2$  SD below the baseline mean, “Health and Ageing in Africa: A Longitudinal Study of an INDEPTH Community in South Africa” (HAALSI), Agincourt, South Africa, 2014-19

| Baseline characteristic   | N cases,<br>unweighted | Unweighted<br>person-years | Weighted<br>person-years | Incidence rate (IR),<br>per 1000-person years<br>(95% CI) | Incidence rate ratio (IRR)<br>(95% CI) |
|---------------------------|------------------------|----------------------------|--------------------------|-----------------------------------------------------------|----------------------------------------|
| Overall                   | 214                    | 13,579.9                   | 16,170.1                 | 17.4 (15.2, 20.0)                                         | -                                      |
| Age                       |                        |                            |                          |                                                           |                                        |
| 40-44                     | 10                     | 1,352.3                    | 1,537.8                  | 7.5 (4.1, 15.1)                                           | 1.00 (ref)                             |
| 45-49                     | 12                     | 1,325.5                    | 1,491.5                  | 10.6 (6.0, 20.4)                                          | 1.41 (0.61, 3.24)                      |
| 50-54                     | 11                     | 2,123.7                    | 2,449.9                  | 5.1 (2.9, 9.9)                                            | 0.68 (0.29, 1.60)                      |
| 55-59                     | 20                     | 1,866.3                    | 2,179.9                  | 11.7 (7.9, 17.4)                                          | 1.42 (0.67, 3.01)                      |
| 60-64                     | 23                     | 1,998.7                    | 2,325.1                  | 15.5 (10.7, 23.4)                                         | 1.57 (0.75, 3.26)                      |
| 65-69                     | 26                     | 1,720.0                    | 2,030.6                  | 18.2 (12.3, 28.3)                                         | 2.05 (1.00, 4.21)                      |
| 70-74                     | 23                     | 1,304.6                    | 1,596.8                  | 20.5 (14.6, 29.8)                                         | 2.36 (1.14, 4.90)                      |
| 75-79                     | 26                     | 928.2                      | 1,195.3                  | 28.8 (19.8, 43.4)                                         | 3.64 (1.78, 7.43)                      |
| 80+                       | 63                     | 960.6                      | 1,363.2                  | 70.0 (54.8, 90.6)                                         | 8.24 (4.29, 15.8)                      |
| Per 5-year age increase   | -                      | -                          | -                        | -                                                         | 1.36 (1.27, 1.45)                      |
| <i>P</i> for linear trend | -                      | -                          | -                        | -                                                         | <0.0001                                |
| Sex/gender                |                        |                            |                          |                                                           |                                        |
| Male                      | 106                    | 6,087.5                    | 7,531.9                  | 19.4 (16.0, 23.7)                                         | 1.00 (ref)                             |
| Female                    | 108                    | 7,492.4                    | 8,638.1                  | 15.6 (12.9, 19.0)                                         | 0.83 (0.64, 1.08)                      |
| Country of birth          |                        |                            |                          |                                                           |                                        |
| South Africa              | 117                    | 9,687.8                    | 11,618.3                 | 13.5 (11.3, 16.3)                                         | 1.00 (ref)                             |
| Mozambique or other       | 97                     | 3,880.8                    | 4,539.0                  | 27.3 (22.4, 33.7)                                         | 1.71 (1.31, 2.22)                      |
| Educational attainment    |                        |                            |                          |                                                           |                                        |
| 0 years                   | 150                    | 5,486.2                    | 6,610.1                  | 29.7 (25.3, 35.1)                                         | 1.00 (ref)                             |
| 1-7 years                 | 42                     | 5,010.8                    | 5,926.4                  | 9.6 (7.1, 13.3)                                           | 0.31 (0.11, 0.87)                      |
| 8-11 years                | 16                     | 1,731.3                    | 2,035.9                  | 9.8 (6.1, 16.8)                                           | 0.77 (0.44, 1.33)                      |
| 12+ years                 | 4                      | 1,324.9                    | 1,564.4                  | 3.1 (1.1, 11.1)                                           | 0.51 (0.36, 0.72)                      |
| Per year of education     | -                      | -                          | -                        | -                                                         | 0.93 (0.88, 0.98)                      |
| Literacy                  |                        |                            |                          |                                                           |                                        |
| Can read and write        | 57                     | 7,671.1                    | 9,055.7                  | 8.4 (6.5, 11.0)                                           | 1.00 (ref)                             |
| Cannot read and/or write  | 157                    | 5,901.0                    | 7,104.9                  | 28.9 (24.7, 34.0)                                         | 2.11 (1.52, 2.93)                      |

## Supplementary Material

|                                            |     |          |          |                   |                   |
|--------------------------------------------|-----|----------|----------|-------------------|-------------------|
| Employment status                          |     |          |          |                   |                   |
| Not working                                | 185 | 9,687.4  | 11,632.8 | 21.0 (18.2, 24.5) | 1.00 (ref)        |
| Homemaker                                  | 15  | 1,475.7  | 1,721.5  | 11.3 (6.9, 19.8)  | 0.56 (0.34, 0.94) |
| Employed                                   | 13  | 2,378.4  | 2,769.8  | 5.5 (3.3, 10.2)   | 0.57 (0.32, 1.01) |
| Marital status                             |     |          |          |                   |                   |
| Married                                    | 78  | 7,362.5  | 8,677.7  | 11.5 (9.2, 14.5)  | 1.00 (ref)        |
| Not married                                | 135 | 6,211.9  | 7,484.6  | 23.9 (20.2, 28.5) | 2.12 (1.55, 2.91) |
| Household asset quintile                   |     |          |          |                   |                   |
| 5 (richest)                                | 20  | 2,900.0  | 3,420.9  | 7.5 (4.9, 12.1)   | 1.00 (ref)        |
| 4                                          | 35  | 2,830.6  | 3,342.1  | 13.6 (9.8, 19.3)  | 1.59 (0.93, 2.71) |
| 3                                          | 40  | 2,684.6  | 3,207.3  | 16.6 (12.3, 23.1) | 1.78 (1.05, 3.01) |
| 2                                          | 51  | 2,621.8  | 3,169.6  | 22.1 (16.8, 29.7) | 2.15 (1.29, 3.61) |
| 1 (poorest)                                | 68  | 2,542.9  | 3,030.0  | 28.5 (22.5, 36.7) | 2.78 (1.67, 4.64) |
| Per quintile decrease                      | -   | -        | -        | -                 | 1.25 (1.13, 1.39) |
| Smoking history                            |     |          |          |                   |                   |
| Never smoker                               | 170 | 10,785.3 | 12,732.4 | 17.5 (15.1, 20.5) | 1.00 (ref)        |
| Current or former smoker                   | 44  | 2,780.8  | 3,419.6  | 17.0 (12.7, 23.2) | 1.03 (0.72, 1.49) |
| Alcohol consumption $\geq 5$ days/week     |     |          |          |                   |                   |
| No                                         | 191 | 12,829.1 | 15,248.1 | 16.5 (14.3, 19.1) | 1.00 (ref)        |
| Yes                                        | 23  | 740.3    | 905.5    | 32.8 (22.0, 50.9) | 1.71 (1.11, 2.63) |
| Hypertension                               |     |          |          |                   |                   |
| No                                         | 77  | 5,689.3  | 6,728.6  | 14.8 (11.8, 18.7) | 1.00 (ref)        |
| Yes                                        | 135 | 7,676.5  | 9,174.8  | 19.5 (16.5, 23.2) | 0.99 (0.76, 1.29) |
| History of stroke, angina, or heart attack |     |          |          |                   |                   |
| No                                         | 199 | 12,900.3 | 15,344.8 | 16.9 (14.7, 19.5) | 1.00 (ref)        |
| Yes                                        | 15  | 672.9    | 876.1    | 26.5 (15.8, 47.7) | 1.50 (0.90, 2.52) |
| History of diabetes                        |     |          |          |                   |                   |
| No                                         | 173 | 11,215.2 | 13,310.9 | 16.8 (14.4, 19.6) | 1.00 (ref)        |
| Yes                                        | 26  | 1,415.7  | 1,698.7  | 20.9 (14.2, 32.1) | 1.10 (0.74, 1.64) |
| HIV status (DBS)                           |     |          |          |                   |                   |
| Negative                                   | 166 | 9,419.2  | 11,142.2 | 19.3 (16.6, 22.6) | 1.00 (ref)        |
| Positive                                   | 30  | 3,030.7  | 3,619.3  | 10.9 (7.6, 16.2)  | 0.85 (0.56, 1.28) |

Note: Person-years for baseline characteristics may not add to the total person-years, due to a small number of missing observations.

## Supplementary Material

---

Note: IRs and IRRS are weighted to account for the probabilities of mortality and study attrition over the follow-up.

Note: Model for age is unadjusted; Model for sex/gender is age-adjusted; Model for country of birth is age- and sex/gender-adjusted; Models for all other variables are adjusted for age, sex/gender, and country of birth.
